# Supplementary material for: Highly photoluminescent and temperature-sensitive P, N, B-co-doped carbon quantum dots and their highly sensitive recognition for curcumin
Source: Royal Society of Chemistry journal article supplement (doi:10.1039/c9ra00183b), 2019-01-01
Supplement: c9ra00183b1.pdf [file c9ra00183b1.pdf]

## Supporting information

### Facile Synthesis of Highly Photoluminescent and Temperature-sensitive P, N, B-co-doped carbon quantum dots and Its Application for Highly Sensitive Recognition of Curcumin and Fluorescent ink Operation

Bin Wu,<sup>ab</sup> Xiaofeng Shi,<sup>a</sup> Wei Han,<sup>a</sup> Taishan Wang,<sup>a</sup> Chunru Wang,<sup>a</sup>  
and Li Jiang\*<sup>ab</sup>

<sup>a</sup> CAS Key Laboratory of Molecular Nanostructure and Nanotechnology,  
CAS Research/Education Center for Excellence in Molecular Sciences,  
Institute of Chemistry, Chinese Academy of Sciences (CAS), Beijing  
100190, P. R. China. E-mail: jiangli@iccas.ac.cn

<sup>b</sup> University of Chinese Academy of Sciences, Beijing 100049, P. R.  
China

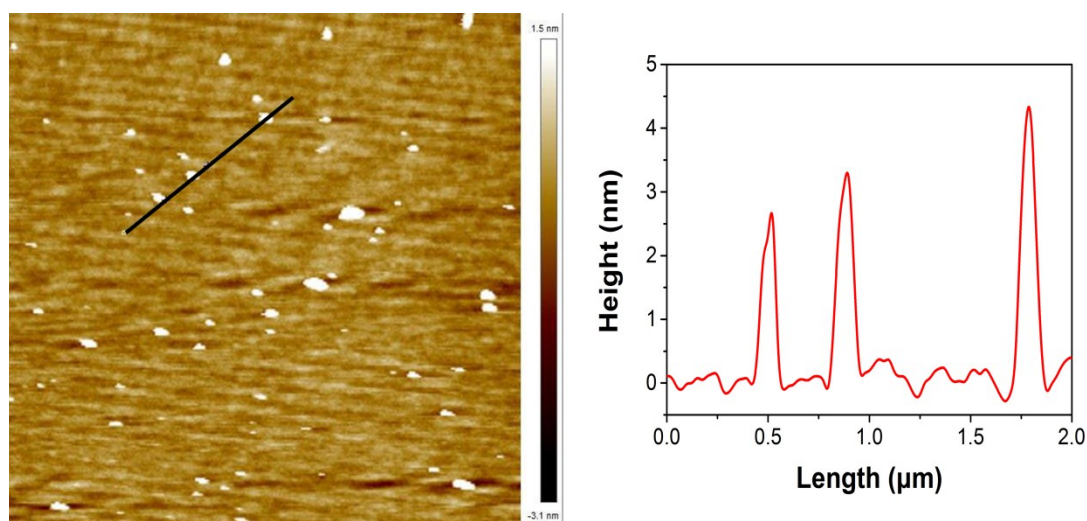

**Fig.S1. (a) AFM image of PNB CDs. (b) height profile of PNB CDs**

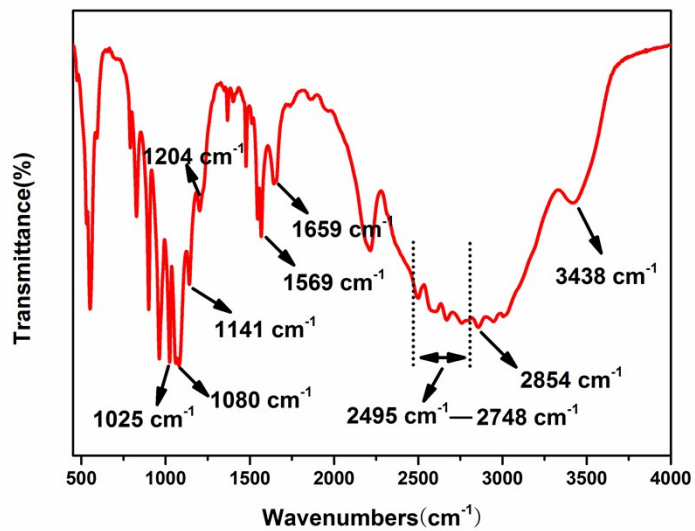

Fig.S2. FTIR spectra of PNBCDs.

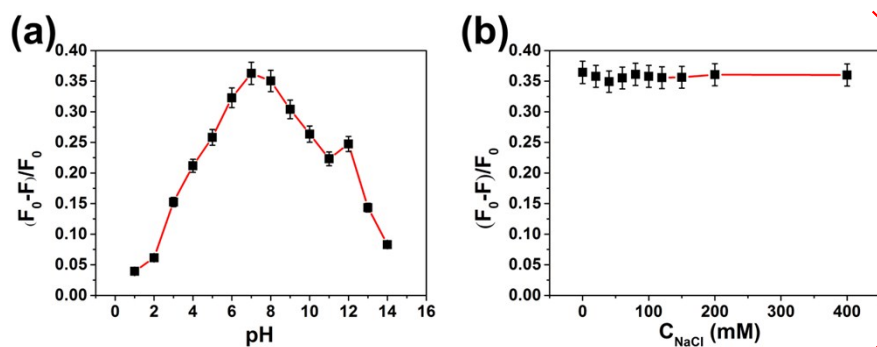

Fig.S3. Effect of pH and ionic strength on the response of PNBCDs to curcumin (concentration of curcumin is 20  $\mu$ mol/L)

Comment [A]: For comment 3 of Referee: 1

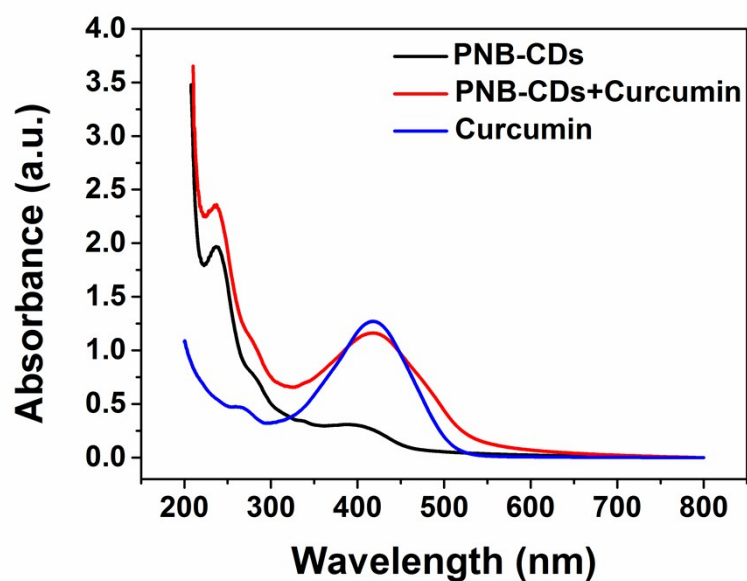

*Fig.S4. UV-vis spectra of the PNB-CDs, PNB-CDs/curcumin, and curcumin solution.*

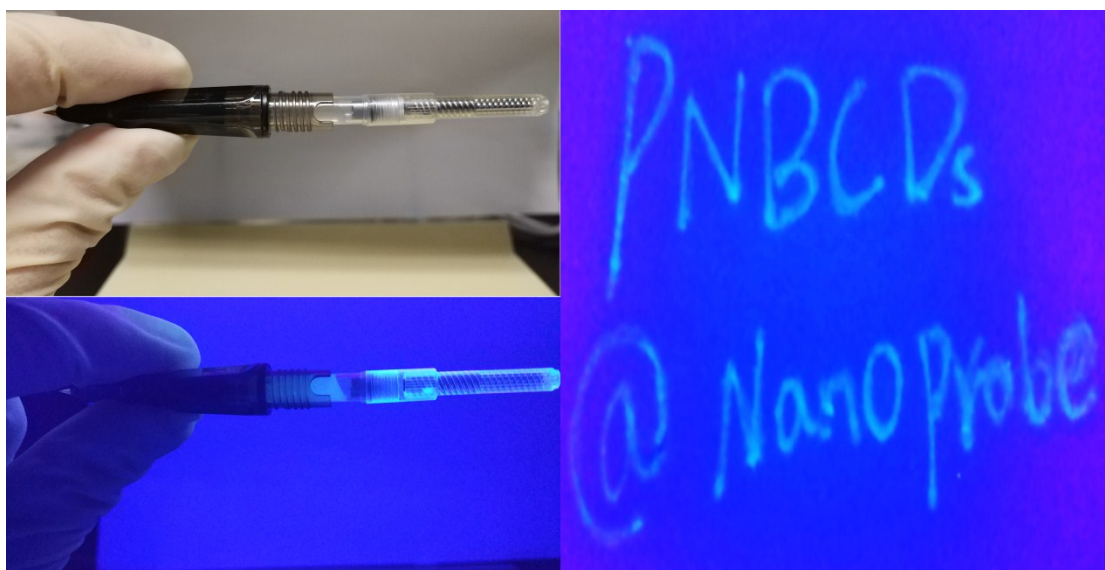

*Fig.S5. the hand written name of the CDs and carbon nanoparticles using fluorescent PNB-CDs coated filter paper under UV light excitation.*

In view of the good photostability and chemical durability of PNB-CDs, we have also employed the highly fluorescent PNB-CDs as a fluorescent ink for display purposes. The PNB-CDs aqueous solutions can be used as a new type of fluorescent ink. The aqueous solution of PNB-CDs was directly injected into a pen without any chemical modification. The name

of the carbon dots written on filter paper excited using a UV lamp is visible to the naked eye and readily flow while writing without any coagulation within the pen in Fig.S4. The carbon dots based fluorescent ink doesn't contaminate nib and tube of fountain pen and can be easily washed off from water. Moreover, the resulting water soluble PNBCDs ink is clear, permanent, pollution free, and easily washable. Therefore, PNBCDs ink might be an alternative and potential for fluorescent pens.
